# Supplementary material
Source: publisher site journal article supplement (https://www.dovepress.com/article/360843)
Supplement: Supplementary file 1 [file get_supplementary_file.php]

**Supplement A: Methods for estimating patient level start and end dates in CPRD Aurum calculated by Boston Collaborative Drug Surveillance Program (BCDSP)**

Table S1 provides the definitions of variables used to estimate a patient-level StartDate and EndDate in CPRD Aurum electronic medical records. Table S2 describes the steps of the StartDate algorithm and Table S3 describes the steps of the EndDate algorithm.

| **Table S1. Definitions** | |
| --- | --- |
| **Term** | **Definition** |
| Plausible Range | Date range when electronic medical records would be possibly in use. Estimated StartDate and EndDate must fall in this range.  Minimum = January 1, 1988 (GPs first started using computers for electronic medical records in 1988) or January 1 of Year of Birth, whichever came later  Maximum = date of CPRD Aurum data download |
| regstartdate | CPRD Aurum data field for most recent registration with practice (See CPRD Aurum Data Specification). This field may be missing or may contain implausible values. |
| regenddate | CPRD Aurum data field for the date the patient’s registration ended with the practice (See CPRD Aurum Data Specification). This field may be missing or may contain implausible values. |
| Rx | Prescriptions (Issue table) in Plausible range |
| Clin | Clinical information that indicates that a patient is active in the record, such as diagnoses, vaccinations, labs, diagnostic, clinical care, referrals in Plausible range.  Use MedCodes (Observation Table) with EMISCatID 1-5, 7, 9, 11-12, 14-16, 20-21, 25, 27-29, 32-36, and 39-47 in CPRD Aurum MedCode dictionary. |
| FirstRecordDate | First date of Rx or Clin in Plausible range |
| LastRecordDate | Last date of Rx or Clin in Plausible range |
| FirstRxDate | First date of Rx in Plausible range |
| FirstClinDate | Last date of Clin in Plausible range |
| DeathDate | There are two death date fields in CPRD Aurum (See CPRD Aurum Data Specification). At the time of this study, emis_ddate was used as the death date for estimation of a patient EndDate. Future studies will use cprd_ddate rather than emis_ddate. |
| lcd | CPRD Aurum data field for last data collection date (practice-level) (See CPRD Aurum Data Specification) |

| **Table S2.** BCDSP’s algorithm to estimate a patient-level StartDate in CPRD Aurum | | | |
| --- | --- | --- | --- |
| **Algorithm Step** | **Primary Condition** | **Secondary Condition** | **Action** |
| 1 | regstartdate missing | | StartDate = FirstRxDate |
| 2 | regstartdate missing | If no Rx | StartDate = FirstClinDate |
| 3 | regstartdate missing | If no Rx or Clin | StartDate = missing |
| 4 | regstartdate < Jan 1, 2000 | | StartDate = FirstRxDate |
| 5 | regstartdate < Jan 1, 2000 | If no Rx | StartDate = FirstClinDate on or after regstartdate |
| 6 | regstartdate < Jan 1, 2000 | If no Rx or Clin | Set StartDate to missing* |
| 7 | regstartdate ≥ Jan 1, 2000 | If difference between FirstRxDate and regstartdate is ≤365 days | StartDate = regstartdate |
| 8 | regstartdate ≥ Jan 1, 2000 | If difference between FirstRxDate and regstartdate is >365 days | StartDate = last of regstartdate or FirstRxDate |
| 9 | regstartdate ≥ Jan 1, 2000 | If no Rx | StartDate = FirstClinDate on or after regstartdate |
| 10 | regstartdate ≥ Jan 1, 2000 | If no Rx or Clin | Set StartDate to missing* |
| 11 | If StartDate in plausible range cannot be calculated by this point | | Set StartDate to missing* |
| Note: Patterns of recording by GPs in electronic records changed in the early 2000’s due to technological advances and the introduction of Quality and Outcome Framework (QOF), a pay-for-performance scheme which improved the collection of data due to reporting requirements.  *Patients for whom a plausible StartDate cannot be estimated do not have clinical or prescription records of high quality for use in research | | | |

| **Table S3.** BCDSP’s algorithm to estimate a patient-level EndDate in CPRD Aurum | | | |
| --- | --- | --- | --- |
| **Algorithm Step** | **Primary Condition** | **Secondary Condition** | **Action** |
| 1 | StartDate is missing* | | Set EndDate to missing* |
| 2 | DeathDate is not missing | | EndDate = minimum, not zero, of DeathDate and lcd |
| 3 | regenddate is not missing and within plausible range | | EndDate = minimum, not zero, of regenddate and lcd |
| 4 | regenddate is missing | If difference between lcd and LastRecordDate is ≤365 days | EndDate = lcd |
| 5 | regenddate is missing | If difference between lcd and LastRecordDate is >365 days | EndDate = earliest of lcd and LastRecordDate |
| 6 | EndDate is calculated | if EndDate < StartDate | EndDate = StartDate |
| 7 | EndDate in plausible range cannot be calculated | | Set EndDate to missing* |
| *Patients for whom a plausible StartDate and/or EndDate cannot be estimated do not have clinical or prescription records of high quality for use in research | | | |

**Supplement B**: Code lists (Prefixed Medcodes)

| **Diagnosis codes for alopecia, hair loss or balding** |
| --- |
| M308993010 Hair and hair follicle diseases  M991541000006118 Hair/hair follicle disease NOS  M889451000006112 Hair/hair follicle disease  M2159152014 C/O: hair loss  M6748841000006110 Complaining of hair loss  M253754015 O/E - loss of hair  M402446018 O/E - patches of alopecia  M411926011 O/E - alopecia  M253766014 O/E - balding  M4552561000006116 On examination - loss of hair  M4552661000006115 On examination - balding  M5508061000006114 On examination - patches of alopecia  M5579111000006111 On examination - alopecia  M98520014 Syphilitic alopecia  M93649013 Alopecia  M105811000006118 Partial loss of hair  M889461000006114 Alopecia - baldness  M399934011 Alopecia unspecified  M93652017 Baldness  M221371000000118 Loss of hair  M113328010 Alopecia areata  M145676010 Male pattern alopecia  M309005018 Premature alopecia  M309007014 Alopecia senilis  M309008016 Alopecia febrilis  M309009012 Alopecia localis  M478201000006118 Alopecia disseminata  M309011015 Cachectic alopecia  M33266015 Alopecia totalis  M309012010 Alopecia follicularis  M717951000006113 Marginal alopecia  M309013017 Alopecia neurotica  M309014011 Peroneal alopecia  M309015012 Alopecia seborrhoeica  M309017016 Alopecia hereditaria  M142888018 Alopecia universalis  M45781013 Alopecia mucinosa  M112148018 Traction alopecia  M309031016 Alopecia NOS  M557231000006116 Scarring alopecia  M309354017 [X]Other alopecia areata  M309355016 Androgenic alopecia  M309356015 Non-scarring alopecia  M309357012 [X]Other cicatricial alopecia  M309367019 Scarring alopecia  M11914151000006111 [X]Cicatricial alopecia - unspecified  M2593021000006114 Ophiasic alopecia areata  M2813721000006114 Total alopecia areata  M3415111000006116 Hair loss disorder  M3609961000006118 Alopecia circumscripta  M3609971000006113 Patchy loss of hair  M3609981000006111 Circumscribed alopecia  M3609991000006114 AA - Alopecia areata  M3900871000006113 Universal alopecia areata  M3928051000006117 Common baldness  M3928061000006115 Hereditary alopecia  M3928071000006110 Male pattern baldness  M3928091000006111 Pattern baldness  M3928101000006117 Androgenetic alopecia  M4807111000006118 Diffuse alopecia  M4807171000006110 Alopecia seborrheica  M5125591000006116 Non-scarring hair loss  M6634391000006113 Alopecia cicatrisata  M6634401000006110 Cicatricial alopecia  M309019018 Drug-induced androgenic alopecia  M4807201000006114 Drug induced androgenic alopecia  M3597991000006112 Traumatic alopecia  M6029017 Congenital alopecia  M315296018 Congenital alopecia - unspecified  M315297010 Congenital localised alopecia  M400949010 Congenital generalised alopecia  M315304014 Congenital alopecia NOS  M2546401000006114 Naevoid congenital alopecia  M2546411000006112 Nevoid congenital alopecia  M4830911000006113 Congenital localized alopecia  M5504171000006113 Congenital generalized alopecia  M6008271000006114 Total congenital alopecia |
| **Supporting codes for alopecia** |
| M460854014 Hair transplant  M872321000006113 Hair transplant  M274664011 Hair bearing skin flap to scalp for male pattern baldness  M814801000006113 Hair bearing graft of skin to scalp for male pattern baldness  M274791019 Hair bearing punch graft to scalp for male pattern baldness  M274792014 Hair bearing strip graft to scalp for male pattern baldness  M274793016 Hair bearing graft to scalp for male pattern baldness NEC  M1776421000006115 Reason for referral: Alopecia  M8341091000006113 SALT - Severity of Alopecia Tool  M2404771000000114 Severity of Alopecia Tool |
| **Diagnosis codes for BPH, prostatism or prostatitis** |
| M396738018 Benign prostatic hypertrophy  M645331000006112 Benign prostatic hyperplasia  M396742015 BPH - Benign prostatic hypertrophy  M304383016 Prostatic hyperplasia of the lateral lobe  M304384010 Prostatic hyperplasia of the medial lobe  M304385011 Prostatic hyperplasia NOS  M909491000006110 [RFC] Enlarged prostate  M279031000006110 O/E - PR - Diffusely enlarged prostate  M11851221000006114 BPH - benign prostatic hyperplasia  M5493351000006113 BPH - Benign prostatic hypertrophy |
| **Supporting codes for BPH** |
| M251768018 H/O: haematuria  M794711000006117 Frequency of micturition  M215531000006114 Polyuria  M1490597011 Frequency of micturition  M11625011 Nocturia  M252783013 Micturition frequency NOS  M646261000006118 Enuresis  M504334012 Nocturnal enuresis  M419993011 Daytime enuresis  M1494848017 Incontinence of urine  M124716012 Urgency of micturition  M507635014 Urge incontinence of urine  M252800015 Micturition stream poor  M1231994019 Hesitancy of micturition  M502907019 Precipitancy of micturition  M252805013 Micturition stream NOS  M518011000006114 Blood in urine - haematuria  M518021000006118 Blood in urine - symptom  M813391000006111 Haematuria - symptom  M47612016 Polyuria  M255420015 Difficulty with micturition  M255187012 On examination - micturition reflex abnormal - retention  M255188019 O/E- micturition reflex abnormal retention and overflow  M255189010 O/E - automatic micturition  M255190018 O/E - micturition reflex NOS  M418965019 Blood in urine  M406330013 Enuresis alarm  M2695613010 Referral to enuresis clinic  M216231017 Enuresis support  M2287031000000117 Referral to haematuria clinic  A1149751000000114 Seen in enuresis clinic  M303878012 Recurrent benign haematuria syndrome  M303986013 Recurrent haematuria  M57480016 Haematuria  M458617017 Essential haematuria  M886851000006119 Haematuria NOS  M304345017 Painless haematuria  M304348015 Painful haematuria  M304353013 Frank haematuria  M317523016 [D]Incontinence of urine  M317524010 Urinary incontinence  M317525011 [D]Urethral sphincter incontinence  M317526012 [D] Urge incontinence  M317527015 [D]Incontinence of urine NOS  M317528013 Micturition frequency and polyuria  M317529017 Increased frequency of urination  M317532019 [D]Polyuria  M317533012 [D]Nocturia  M317534018 [D]Frequency of micturition or polyuria NOS  M1222518015 [D]Difficulty with micturition  M292171000006114 [D] Urgency of micturition  M318017018 [X]Other difficulties with micturition  M318021013 Painful micturition  A1682771000006111 Seen in haematuria clinic  A1708851000006118 Seen in enuresis clinic  L8400951000006113 Blood in urine test  M12704781000006114 Frequency of micturition  M1676411000006116 Refer to enuresis clinic  M1682781000006114 Referred to haematuria clinic  M1777475010 Overflow incontinence of urine  M1935511000006110 Minimum micturition volume  M1935521000006119 Maximum micturition volume  M1936661000006118 Coughing incontinence of urine  M1936681000006111 Sneezing incontinence of urine  M1936701000006114 Incontinence of urine on walking  M1936711000006112 Incontinence of urine during sexual intercourse  M1936721000006116 Incontinence of urine during exercise  M1936761000006110 Suspected overflow incontinence of urine  M2627801000006115 Nocturnal incontinence of urine  M3054541000006112 Blood in urine  M3178831000006117 Enuresis  M3303661000006119 Pain on micturition  M3364291000006110 Haematuria syndrome  M3364321000006118 Blood in urine - hematuria  M354736014 Giggle incontinence of urine  M4546631000006110 Increased frequency of micturition  M4571151000006117 On examination - micturition reflex abnormal - retention  M4571171000006110 O/E- micturition reflex abnormal retention and overflow  M4571191000006111 On examination - micturition reflex abnormal retention and overflow  M4571211000006112 On examination - automatic micturition  M4790361000006116 Macroscopic haematuria  M5880501000006117 FOM - Frequency of micturition  M5880511000006119 Periodicity of micturition  M6026151000006118 Provision of enuresis alarm  M6044681000006112 Haematuria of undiagnosed cause  M6044721000006117 Haematuria - cause not known  M759421000006112 IPSS - nocturia  M908531000006116 [RFC] Enuresis  M917531000006118 Bladder: urge incontinence  M917591000006119 Nocturia  M918181000006112 Urge incontinence of urine  M962031000006113 Haematuria/abnormal colour  M981411000006117 Nocturia  M397930010 Genitourinary symptoms  M371954015 Urinary symptoms  M217691000000114 Observation of frequency of urination  M217701000000114 Urinary frequency  M397940013 Cannot pass urine - retention  M252803018 Terminal dribbling of urine  M498306016 Dribbling of urine  M82701015 Dysuria  M252884014 Genitourinary symptoms NOS  M450831019 Lower urinary tract symptoms  M1691621000000118 Mild lower urinary tract symptoms  M1691601000000110 Moderate lower urinary tract symptoms  M1691581000000118 Severe lower urinary tract symptoms  M295388019 Psychogenic dysuria  M1494943010 [X]Psychogenic dysuria  M317511010 [D]Dysuria  M317514019 [D]Dysuria NOS  M317515018 Retention of urine  M317516017 Clot retention of urine  M301331000006112 Postoperative retention of urine  M317520018 Acute retention of urine  M317521019 Chronic retention of urine  M317522014 [D]Retention of urine unspecified  M1014151000006116 Adverse reaction to Urinary Frequency - Nocturnal Enuresis - And Incontinence  M11813981000006113 Psychic dysuria  M1726491000006117 LUTS - Lower urinary tract symptoms  M2767381000006118 Spastic dysuria  M4546681000006111 Urinary frequency  M5097091000006115 ARU - Acute retention of urine  M5097131000006118 CRU - Chronic retention of urine  M5880471000006112 Finding of frequency of urination  M5880491000006113 Frequency of urination  M5969611000006118 LUTS - Lower urinary tract symptoms  M6255291000006115 Frequency of urination  M906291000006116 [RFC] Retention of urine  M962021000006110 Abnormal urinary frequency/amount  M256409010 Prostatic hypertrophy risk score  M2693752010 Total international prostate symptom score  M304403018 Disorder of prostate  M977601000006118 Echography of prostate - transrectal approach  M376642016 Urodynamic studies  M273061011 Optical urethrotomy |
| **Codes for urology referral/visits** |
| M283539018 Urology emergency hospital admission  M283579010 Non-urgent urology admission  M408201000000118 Referral to urology special interest general practitioner  M283665014 Referred to urologist  M283854018 Urology self-referral  M1757051000000110 Referral to community urology service  M283989017 Listed for Urology admission  M2533397015 Referral to genitourinary clinic  M2533398013 Referral to male urology clinic  M284101013 Private referral to urologist  A1488337012 Urology  A285211015 Seen in urology clinic  A741231000000118 In-house urology first appointment  A741291000000117 In-house urology follow-up appointment  A741351000000117 In-house urology discharge  A448252010 Seen by urologist  A1954871000006115 Surgical urology (secondary group)  M12482291000006116 Admit urology emergency  M1578001000006116 Intention To Admit Urology  M449298015 Referral to urologist  M449777016 Discharge from urology service  M4723551000006111 Urology emergency hospital admission  M5952891000006110 Referral to urology service  M831281000006113 2 week rule referral - urology  M904551000006116 Urology referral  M971661000006114 Intention to admit urology  M974681000006119 Referral to male urology clinic |
| **Diagnosis codes for erectile dysfunction / impotence** |
| M371290017 Cannot get an erection  M371298012 Cannot sustain an erection  M1734321000000113 C/O erectile dysfunction  M1734281000000117 Diabetic erectile dysfunction review  M1734721000000114 Assessment of diabetic erectile dysfunction  M2380481000000115 Enquiry about diabetic erectile dysfunction declined  M882471000006114 Frigidity and impotence  M1777409015 Impotence  M1786154013 Erectile dysfunction  M991801000006118 Psychogenic impotence  M396141000006114 [X]Male erectile disorder  M424011000006115 Psychogenic impotence  M304501018 Impotence of organic origin  M932201000006116 Erectile dysfunction organic  M2243331000000115 Erectile dysfunction due to diabetes mellitus  M4790831000006116 Organic erectile dysfunction  M6592991000006118 Sexual impotence  M7486621000006118 Complaining of erectile dysfunction  M7486631000006115 Complaining of impotence |
| **Supporting codes for erectile dysfunction** |
| M302271000000119 Referral to erectile dysfunction clinic  M1736291000000114 Referral to erectile dysfunction clinic declined  D216655018 Advice about impotence  M812271000006113 H/O:sexual dysfunction problem  M5497141000006118 History of sexual dysfunction  M401788011 Psychosexual dysfunction  M295111013 Unspecified psychosexual dysfunction  M401789015 Psychosexual dysfunction NOS  M426661000006119 Non-organic sexual dysfunction  M3424581000006114 Sexual dysfunction  M272294012 Revascularisation for impotence  M272299019 Ligation of penile veins for impotence  M203631000006111 Prosthesis of penis  M89755015 Penile prosthesis  M783301000006115 Implantation of unspecified penile prosthesis  M394446016 Attention to penile prosthesis  M96257012 Removal of penile prosthesis  M354302018 Renewal of penile prosthesis  M354303011 Revision of penile prosthesis  M273338019 Implantation of semi-rigid penile prosthesis  M1225084013 Implantation of inflatable penile prosthesis  M273339010 Other specified prosthesis of penis  M273340012 Prosthesis of penis NOS  M273365014 Penile injection to produce erection  M489201000000110 Operations on penis for erectile dysfunction NEC  M364564016 Provision of penile vacuum constriction device  M1119471000006114 Adverse reaction to Vacuum pumps for erectile dysfunction  M1838911000006118 Provision of penile vacuum constriction device  M1936351000006112 H/O: insertion of penile prosthesis  M2925471000006116 Insertion of inflatable penile prosthesis  M2925481000006118 Implant of inflatable penile prosthesis  M3266561000006119 Insertion of penile prosthesis  M3266571000006114 Implantation of penile prosthesis  M3375791000006114 Penile prosthesis - device  M5487451000006112 Penile prosthesis operation  M397839010 H/O: sexual function problem  M411548013 H/O:male sex function problem  M252938017 Sexual symptom  M812271000006113 H/O:sexual dysfunction problem  M5497151000006116 History of sexual function problem  M295091011 Psychosexual disorder  M401788011 Psychosexual dysfunction  M295111013 Unspecified psychosexual dysfunction  M68432015 Psychogenic dyspareunia  M401789015 Psychosexual dysfunction NOS  M295118019 Other psychosexual disorders  M295120016 Other psychosexual disorder NOS  M295121017 Psychosexual disorder NOS  M426661000006119 Non-organic sexual dysfunction  M384551000006110 Failure of genital response  M423911000006117 [X]Psychogenic dyspareunia  M405041000006112 [X]Oth sex dysfunction - not caused by organic disordr/dsease  M430391000006119 [X]Unspec sex dysfunction not caused by organic disordr/dis  D265052013 Psychosexual counselling  M2533414012 Referral to psychosexual clinic  A2007321000006118 SRH care activity - psychosexual therapy  A2007331000006115 SRH care activity - psychosexual referral (with advice)  D4639911000006114 Psychosexual counseling  M923781000006112 Psychosexual counselling |
| **Diagnosis codes for hypertension** |
| M251674014 H/O: Hypertension  M264471012 Good Hypertension Control  M264472017 Poor Hypertension Control  M264485019 Hypertension Treatm. Started  M264486018 Hypertensive Treatm.Changed  M264487010 Hypertension Treatm.Stopped  M443764015 On Treatment For Hypertension  M451424017 Antihypertensive Therapy  M64168014 Hypertensive Disease  M523801000006119 Bp - Hypertensive Disease  M99042012 Essential Hypertension  M99047018 Primary Hypertension  M131046010 Malignant Essential Hypertension  M3135013 Benign Essential Hypertension  M93494011 Systolic Hypertension  M80224019 Diastolic Hypertension  M395751018 Essential Hypertension Nos  M790121000006116 Hypertension Nos  M107545013 Hypertensive Heart Disease  M90135019 Malignant Hypertensive Heart Disease  M728681000006116 Malignant Hypertensive Heart Disease Without Ccf  M728671000006119 Malignant Hypertensive Heart Disease With Ccf  M299650019 Malignant Hypertensive Heart Disease Nos  M60444016 Benign Hypertensive Heart Disease  M504911000006115 Benign Hypertensive Heart Disease Without Ccf  M504901000006118 Benign Hypertensive Heart Disease With Ccf  M299654011 Benign Hypertensive Heart Disease Nos  M741661000006118 Hypertensive Heart Disease Nos  M741691000006114 Hypertensive Heart Disease Nos Without Ccf  M411508017 Cardiomegaly - Hypertensive  M741681000006111 Hypertensive Heart Disease Nos With Ccf  M299655012 Hypertensive Heart Disease Nos  M64282015 Hypertensive Renal Disease  M54939014 Nephrosclerosis  M108730018 Malignant Hypertensive Renal Disease  M1409014 Benign Hypertensive Renal Disease  M299665018 Hypertensive Renal Disease With Renal Failure  M395753015 Hypertensive Renal Disease Nos  M47076011 Renal Hypertension  M143003017 Hypertensive Heart And Renal Disease  M110659019 Malignant Hypertensive Heart And Renal Disease  M109700019 Benign Hypertensive Heart And Renal Disease  M741701000006114 Hypertensive Heart&Renal Dis Wth (Congestive) Heart Failure  M299673010 Hypertensive Heart And Renal Disease With Renal Failure  M789941000006117 Hyperten Heart&Renal Dis+Both(Congestv)Heart And Renal Fail  M299675015 Hypertensive Heart And Renal Disease Nos  M53452019 Secondary Hypertension  M151161000006115 Secondary Malignant Hypertension  M299676019 Secondary Malignant Renovascular Hypertension  M299677011 Secondary Malignant Hypertension Nos  M299678018 Secondary Benign Hypertension  M2478822013 Secondary Benign Renovascular Hypertension  M299680012 Secondary Benign Hypertension Nos  M299681011 Hypertension Secondary To Endocrine Disorders  M158241000006117 Secondary Hypertension Nos  M299683014 Secondary Renovascular Hypertension Nos  M299684015 Hypertension Secondary To Drug  M299682016 Secondary Hypertension Nos  M1846961000006115 Severe Hypertension (Nat Inst For Health Clinical Ex 2011)  M2193021000000110 Severe Hypertension  M2193971000000110 Hypertension Resistant To Drug Therapy  M1846991000006111 Stage 2 Hypertension (Nice - Nat Ins For Hth Clin Excl 2011)  M299686018 Other Specified Hypertensive Disease  M299687010 Hypertensive Disease Nos  M84112010 Hypertensive Crisis  M300869017 [X]Hypertensive Diseases  M300870016 [X]Other Secondary Hypertension  M300871017 [X]Hypertension Secondary To Other Renal Disorders  M909441000006118 [Rfc] Hypertension  M1806071000006118 Stage 1 Hypertension  M1806081000006115 Stage 2 Hypertension  M1806141000006113 Severe Hypertension  M1823901000006112 Hypertension Confirmed  M884121000006111 Malignant Hypertension  M884131000006114 Hypertensive Renal + Heart Dis  M1846941000006119 Stage 1 Hypertension (Nice - Nat Ins For Hth Clin Excl 2011)  M2193031000000112 Stage 1 Hypertension |
| **Supporting codes for hypertension** |
| M64172013 High blood pressure  M459379010 Borderline blood pressure  M317910016 Raised blood pressure  C4556471000006113 On examination - blood pressure borderline raised  C4556501000006118 On examination - blood pressure reading raised  C4556531000006114 On examination - blood pressure reading very high  M1009231000006116 24 hr blood pressure abnormal  M2885771000006113 Finding of increased blood pressure  M2885791000006114 Blood pressure elevation  M3117411000006118 High blood pressure  M3117451000006117 BP - High blood pressure  M3117471000006110 HBP - High blood pressure  M3117491000006111 High blood pressure disorder  M961661000006115 Elevated pulse/respirations/blood pressure  M961921000006116 Abnormal blood pressure reading |
| **Codes for associated with recorded blood pressure measurements** (other codes exist but were only very rarely used in the data) |
| C114311000006111 Systolic arterial pressure  C619931000006119 Diastolic arterial pressure |

**Supplement C**. Study population flow chart


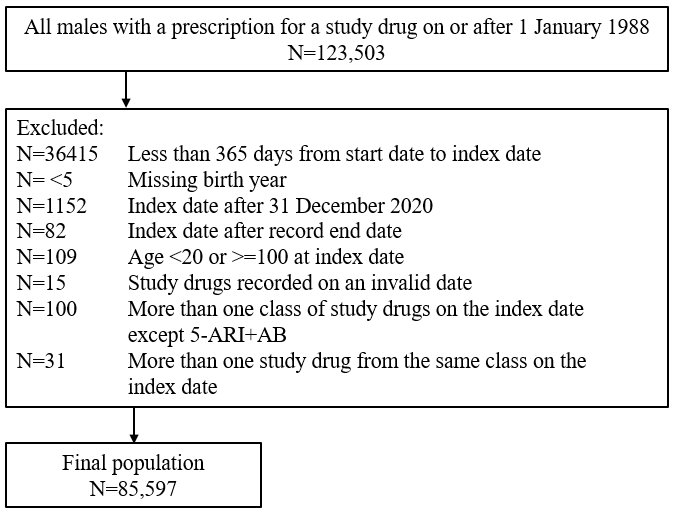


**Supplement D**. Sensitivity analysis 1: Recorded indications for use with increasingly broad definitions, by study drug among patients **with no history of prostate cancer, prostatectomy or other procedures of the prostate, urethra or bladder neck**

| Diagnosis | All study drugs  N=77,265 (%) | 5-ARI ± AB  N=7713 (%) | AB only  N=54755 (%) | Tadalafil  N=14797 (%) |
| --- | --- | --- | --- | --- |
| Any indication |  |  |  |  |
| Narrow | 37146 (48.1) | 3281 (42.5) | 23816 (43.5) | 10049 (67.9) |
| Broad | 57391 (74.3) | 5382 (69.8) | 41666 (76.1) | 10343 (69.9) |
| Widest | 64714 (83.8) | 5958 (77.2) | 46822 (85.5) | 11934 (80.7) |
| BPH * |  |  |  |  |
| Narrow | 16927 (21.9) | 2886 (37.4) | 13993 (25.6) | 48 (0.3) |
| Broad | 34763 (45.0) | 4995 (64.8) | 29263 (53.4) | 505 (3.4) |
| Widest | 41003 (53.1) | 5580 (72.3) | 34199 (62.5) | 1224 (8.3) |
| Hypertension * |  |  |  |  |
| Narrow | 10601 (13.7) | 0 (0.0) | 10601 (19.4) | 0 (0.0) |
| Broad | 14667 (19.0) | 0 (0.0) | 14667 (26.8) | 0 (0.0) |
| Widest | 17781 (23.0) | 0 (0.0) | 17781 (32.5) | 0 (0.0) |
| ED * |  |  |  |  |
| Narrow | 10032 (13.0) | 0 (0.0) | 0 (0.0) | 10032 (67.8) |
| Broad | 10186 (13.2) | 0 (0.0) | 0 (0.0) | 10186 (68.8) |
| Widest | 11736 (15.2) | 0 (0.0) | 0 (0.0) | 11736 (79.3) |
| Alopecia * |  |  |  |  |
| Narrow | 398 (0.5) | 398 (5.2) | 0 (0.0) | 0 (0.0) |
| Broad | 406 (0.5) | 406 (5.3) | 0 (0.0) | 0 (0.0) |
| Widest | 467 (0.6) | 467 (6.1) | 0 (0.0) | 0 (0.0) |

* Patients may have diagnoses/clinical codes consistent with more than one indication for use. Among users of all study drug and using the widest definitions: N=5158 (6.7%) BPH+hypertension, N=1026 (1.3%) BPH+ED, and N=89 (0.1%) BPH+alopecia.

**Supplement E**. Sensitivity analysis 2: Recorded indications for use with increasingly broad definitions, by study drug among patients **with first study drug prescription in 2005 or later**

| Diagnosis | All study drugs  N= 62665 (%) | 5-ARI ± AB  N= 5959 (%) | AB only  N = 42911 (%) | Tadalafil  N= 13795 (%) |
| --- | --- | --- | --- | --- |
| Any indication |  |  |  |  |
| Narrow | 29039 (46.3) | 2454 (41.2) | 17247 (40.2) | 9338 (67.7) |
| Broad | 48200 (76.9) | 4608 (77.3) | 33851 (78.9) | 9741 (70.6) |
| Widest | 53833 (85.9) | 5072 (85.1) | 37575 (87.6) | 11186 (81.1) |
| BPH * |  |  |  |  |
| Narrow | 12671 (20.2) | 2140 (35.9) | 10456 (24.4) | 75 (0.5) |
| Broad | 30698 (49.0) | 4300 (72.2) | 25623 (59.7) | 775 (5.6) |
| Widest | 36417 (58.1) | 4780 (80.2) | 30034 (70.0) | 1603 (11.6) |
| Hypertension * |  |  |  |  |
| Narrow | 7151 (11.4) | 0 (0.0) | 7151 (16.7) | 0 (0.0) |
| Broad | 9661 (15.4) | 0 (0.0) | 9661 (22.5) | 0 (0.0) |
| Widest | 11176 (17.8) | 0 (0.0) | 11176 (26.0) | 0 (0.0) |
| ED * |  |  |  |  |
| Narrow | 9306 (14.9) | 0 (0.0) | 0 (0.0) | 9306 (67.5) |
| Broad | 9417 (15.0) | 0 (0.0) | 0 (0.0) | 9417 (68.3) |
| Widest | 10820 (17.3) | 0 (0.0) | 0 (0.0) | 10820 (78.4) |
| Alopecia * |  |  |  |  |
| Narrow | 317 (0.5) | 317 (5.3) | 0 (0.0) | 0 (0.0) |
| Broad | 325 (0.5) | 325 (5.5) | 0 (0.0) | 0 (0.0) |
| Widest | 368 (0.6) | 368 (6.2) | 0 (0.0) | 0 (0.0) |

* Patients may have diagnoses/clinical codes consistent with more than one indication for use. Among users of all study drug and using the widest definitions: N=3635 (5.8%) BPH+hypertension, N=1237 (2.0%) BPH+ED, and N=76 (0.1%) BPH+alopecia.

**Supplement F**. Sensitivity analysis 1: Presence of any indication (widest definitions) by study drug class, age and calendar year, among patients with **no history of prostate cancer, prostatectomy or other procedures of the prostate, urethra or bladder neck**

| Characteristic at index date | n with recorded indication / N total (%) | | | |
| --- | --- | --- | --- | --- |
| All study drugs | 5-ARI±AB | AB only | Tadalafil only |
| All | 64714 / 77265 (84%) | 5958 / 7713 (77%) | 46822 / 54755 (86%) | 11934 / 14797 (81%) |
| Age |  |  |  |  |
| 20–39 | 2526 / 3226 (78%) | 329 / 458 (72%) | 1156 / 1437 (80%) | 1041 / 1331 (78%) |
| 40–59 | 19626 / 23331 (84%) | 766 / 1021 (75%) | 12854 / 14862 (86%) | 6006 / 7448 (81%) |
| 60–79 | 35520 / 41996 (85%) | 3547 / 4509 (79%) | 27197 / 31615 (86%) | 4776 / 5872 (81%) |
| 80–99 | 7042 / 8712 (81%) | 1316 / 1725 (76%) | 5615 / 6841 (82%) | 111 / 146 (76%) |
| Calendar Year |  |  |  |  |
| 1988–1994 | 830 / 1147 (72%) | 203 / 317 (64%) | 627 / 830 (76%) | NA |
| 1995–1999 | 3969 / 5692 (70%) | 535 / 951 (56%) | 3434 / 4741 (72%) | NA |
| 2000–2004 | 11102 / 13911 (80%) | 943 / 1361 (69%) | 8617 / 10437 (83%) | 1542 / 2113 (73%) |
| 2005–2009 | 15196 / 18151 (84%) | 1386 / 1706 (81%) | 9291 / 10652 (87%) | 4519 / 5793 (78%) |
| 2010–2014 | 16603 / 19317 (86%) | 1419 / 1671 (85%) | 11078 / 12723 (87%) | 4106 / 4923 (83%) |
| 2015–2020 | 17014 / 19047 (89%) | 1472 / 1707 (86%) | 13775 / 15372 (90%) | 1767 / 1968 (90%) |

NA = not applicable. Tadalafil was first marketed in UK in 2003.

**Supplement G**. Sensitivity analysis 2: Presence of any indication (widest definitions) by study drug class, age and calendar year, among patients **with first study drug prescription in 2005 or later**

| Characteristic at index date | n with recorded indication / N total (%) | | | |
| --- | --- | --- | --- | --- |
| All study drugs | 5-ARI±AB | AB only | Tadalafil only |
| All | 53833 / 62665 (86%) | 5072 / 5959 (85%) | 37575 / 42911 (88%) | 11186 / 13795 (81%) |
| Age |  |  |  |  |
| 20–39 | 2116 / 2647 (80%) | 270 / 366 (74%) | 902 / 1096 (82%) | 944 / 1185 (80%) |
| 40–59 | 15708 / 18353 (86%) | 570 / 705 (81%) | 9712 / 10967 (89%) | 5426 / 6681 (81%) |
| 60–79 | 29065 / 33524 (87%) | 2866 / 3280 (87%) | 21514 / 24476 (88%) | 4685 / 5768 (81%) |
| 80–99 | 6944 / 8141 (85%) | 1366 / 1608 (85%) | 5447 / 6372 (85%) | 131 / 161 (81%) |
| Calendar Year |  |  |  |  |
| 2005–2009 | 16815 / 20232 (83%) | 1707 / 2063 (83%) | 10369 / 11980 (87%) | 4739 / 6189 (77%) |
| 2010–2014 | 18229 / 21319 (86%) | 1679 / 1956 (86%) | 12162 / 14052 (87%) | 4388 / 5311 (83%) |
| 2015–2020 | 18789 / 21114 (89%) | 1686 / 1940 (87%) | 15044 / 16879 (89%) | 2059 / 2295 (90%) |
